# Supplementary material for: Pride and prejudice – What can we learn from peer review?
Source: PubMed Central journal article supplement (PMC7497287; doi:10.1080/0142159x.2020.1774527), 2020-07-06
Supplement: IMTE_A_1774527_SM8381.pdf [file IMTE_A_1774527_SM8381.pdf]

### Supplementary figure 1: Schematic of the data collection process.

1  
2  
3  
4  
5  
6  
7  
8  
9  
10  
11  
12  
13  
14  
15  
16  
17  
18  
19  
20  
21  
22  
23  
24  
25  
26  
27  
28  
29  
30  
31  
32  
33  
34  
35  
36  
37  
38  
39  
40  
41  
42  
43  
44

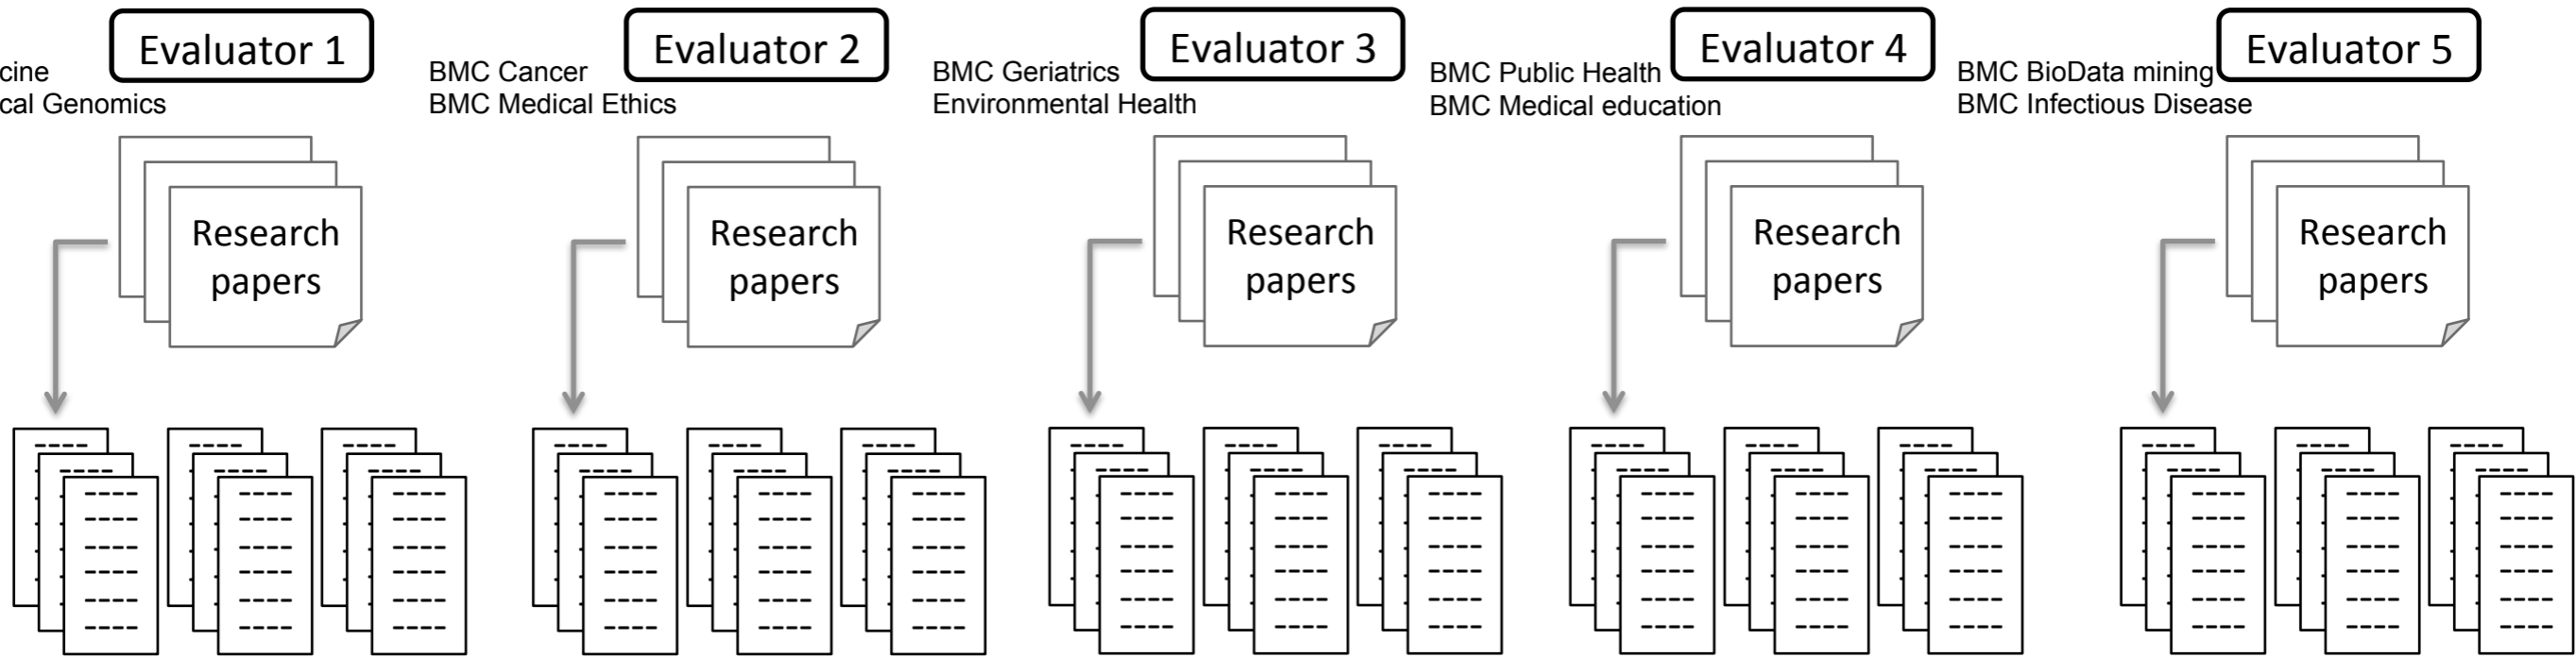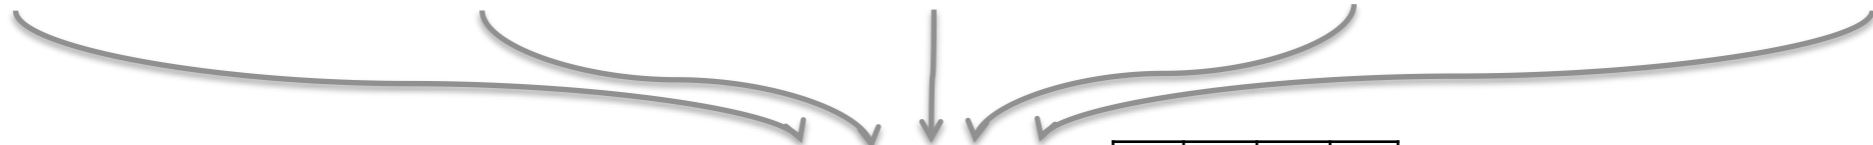

\* Score from 1 to 5

|                                 | 1 | 2 | 3 | ... |
|---------------------------------|---|---|---|-----|
| Level of detail                 |   |   |   |     |
| Length of review                |   |   |   |     |
| No. of comments                 |   |   |   |     |
| Constructiveness                |   |   |   |     |
| Positiveness                    |   |   |   |     |
| Harshness / meanness            |   |   |   |     |
| Request for additional analysis |   |   |   |     |

E-Mail: [medicalteacher@dundee.ac.uk](mailto:medicalteacher@dundee.ac.uk) URL: <http://mc.manuscriptcentral.com/CMTE>

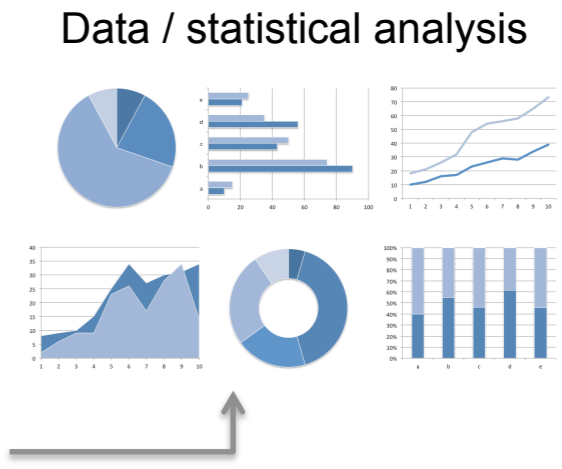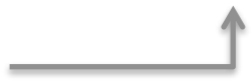

Squares with significant p-values (< 0.01) are colored in blue or red accordingly to the correlation value (red if negative, blue if positive), Squares indicating correlations with p-value > 0.01 are white.

1  
2  
3  
4  
5  
6  
7  
8  
9  
10  
11  
12  
13  
14  
15  
16  
17  
18  
19  
20  
21  
22  
23  
24  
25  
26  
27  
28  
29  
30  
31  
32  
33  
34  
35  
36  
37  
38  
39  
40  
41  
42

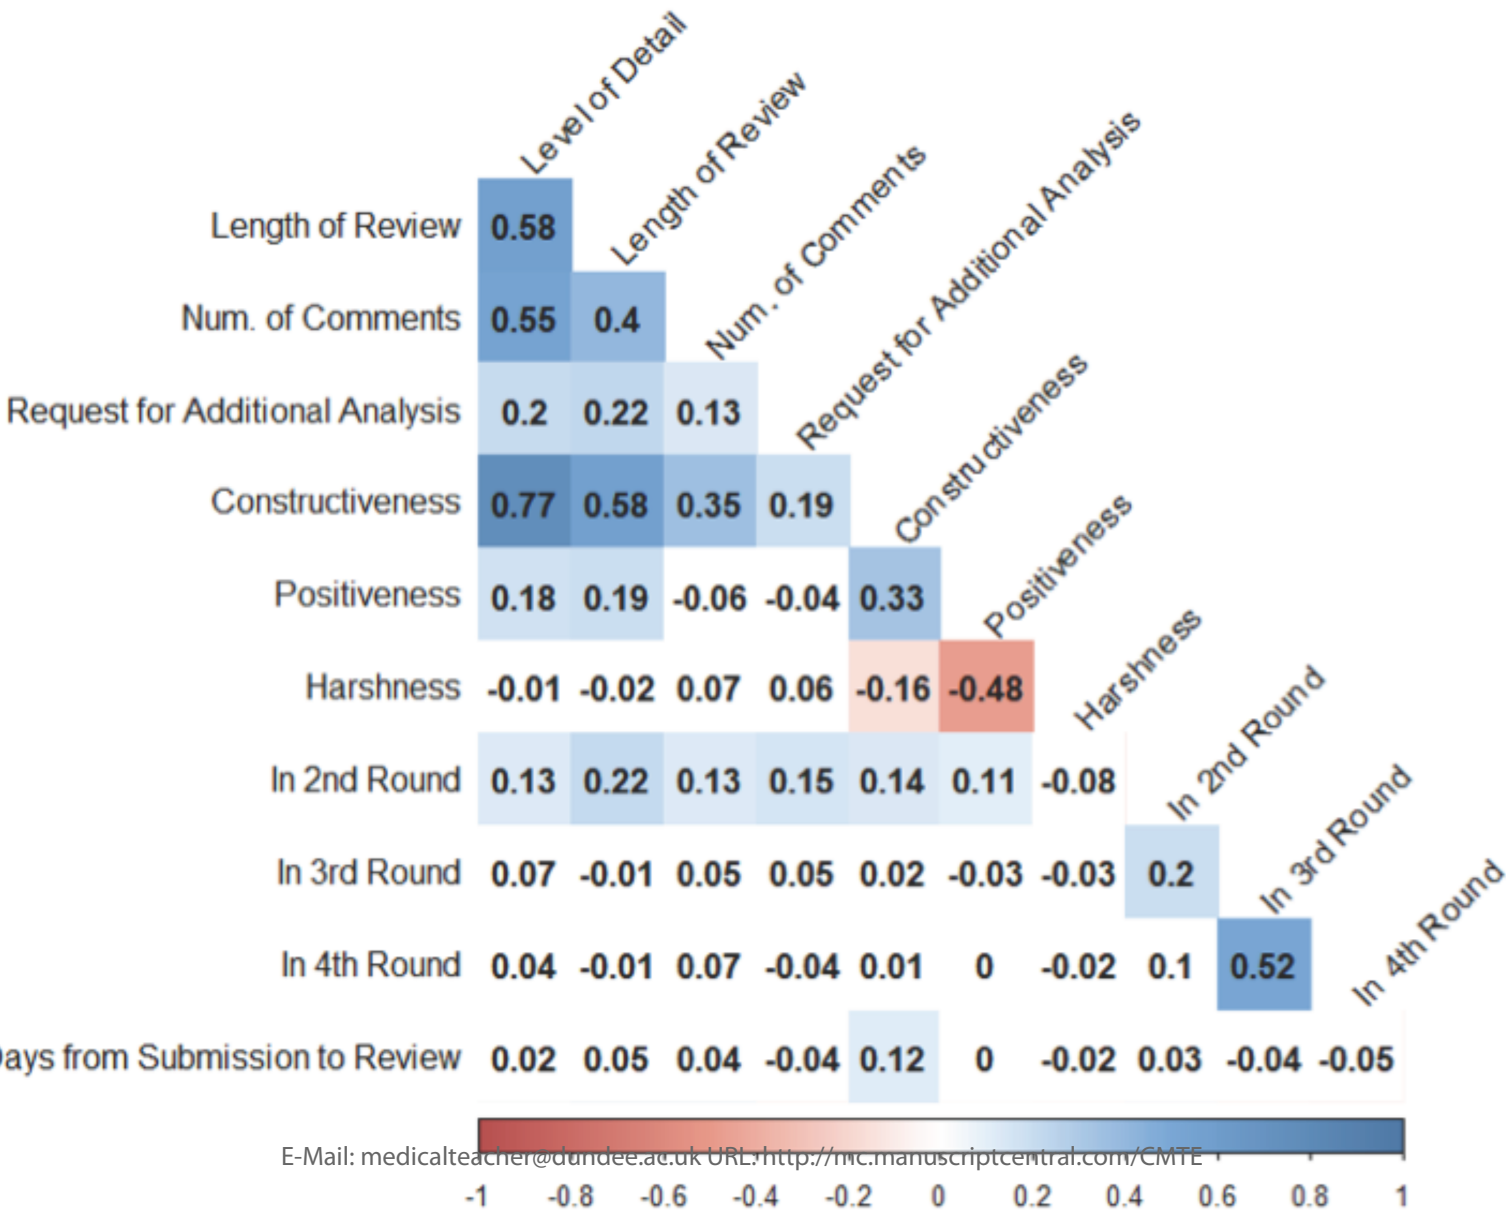

## Estimates produced by the regression analysis

|               | <i>Estimate</i>     | <i>Std.Error</i> | <i>t value</i> | <i>Pr(&gt; t )</i> |
|---------------|---------------------|------------------|----------------|--------------------|
|               | <b>Harshness</b>    |                  |                |                    |
| <b>Winter</b> | 0.26425             | 0.08969          | 2.946          | 0.00334            |
| <b>Spring</b> | 0.11622             | 0.07355          | 1.58           | 0.115              |
| <b>Summer</b> | -0.14819            | 0.07043          | -2.104         | 0.0358             |
| <b>Fall</b>   | -0.10525            | 0.06786          | -1.551         | 0.121              |
|               | <b>Positiveness</b> |                  |                |                    |
| <b>Winter</b> | -0.255              | 0.1166           | -2.186         | 0.0292             |
| <b>Spring</b> | -0.22915            | 0.12249          | -1.871         | 0.0619             |
| <b>Summer</b> | 0.26995             | 0.1173           | 2.301          | 0.0217             |
| <b>Fall</b>   | 0.18412             | 0.11309          | 1.628          | 0.104              |

# Supplementary figure 4: A comparison of sentiment in reviewers' reports from open and confidential peer review

1  
2  
3  
4  
5  
6  
7  
8  
9  
10  
11  
12  
13  
14  
15  
16  
17  
18  
19  
20  
21  
22  
23  
24  
25  
26  
27  
28  
29  
30  
31  
32  
33  
34

## Harshness

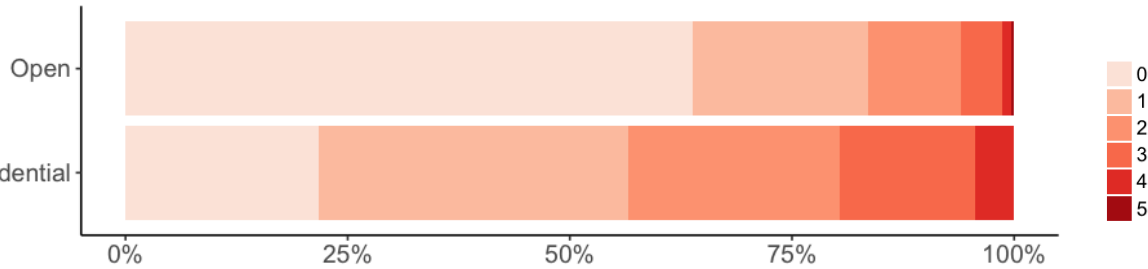

## Positiveness

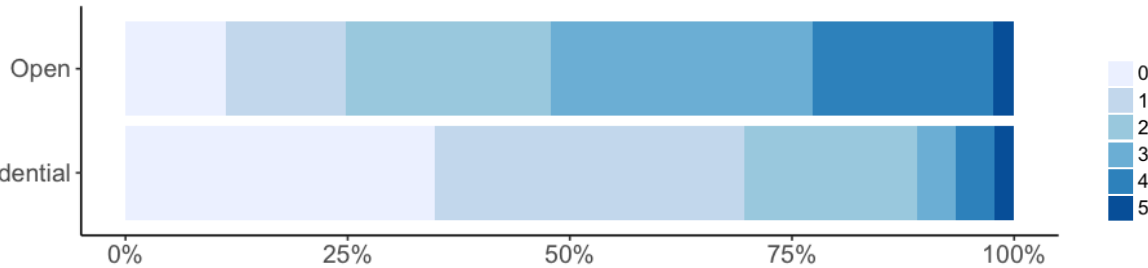

## Constructiveness

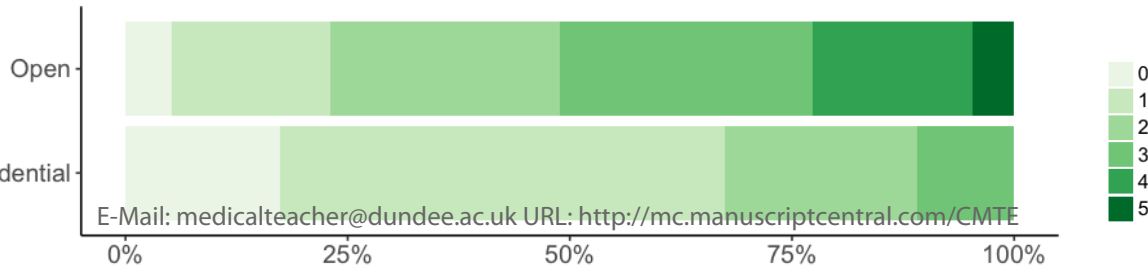

E-Mail: [medicalteacher@dundee.ac.uk](mailto:medicalteacher@dundee.ac.uk) URL: <http://mc.manuscriptcentral.com/CMTE>
